TITLE: OXYGENATION OF PERIPHERAL TISSUES IN YOUNG AND ELDERLY PATIENTS DURING SPINAL ANESTHESIA

AUTHORS: R Johnson, M.D., D Swift, M.D., S Muravchick, M.D., Ph.D.

AFFILIATION: University of Pennsylvania School of Medicine, Philadelphia, Pennsylvania 19104

**INTRODUCTION:** Supplemental oxygen via nasal prongs is routinely provided to patients undergoing regional anesthesia. Although  $F_{iO_2}$  and arterial oxygenation are elevated by this practice<sup>(1)</sup>, improved delivery of  $O_2$  to peripheral tissues, the ultimate goal of such therapy, has never been demonstrated. Peripheral tissue  $O_2$  tension<sup>(2,3)</sup> is a valid monitor of  $O_2$  transport *in vivo*<sup>(2,3)</sup>. This study determined whether continuously-measured transcutaneous  $O_2$  tension (TCPO<sub>2</sub>) changed significantly during spinal anesthesia with supplementary  $O_2$  therapy.

**METHODS:** 20 young (range 18-38 yrs) and 23 elderly (range 61-86 yrs) patients (ASA I-III) undergoing spinal anesthesia for elective surgery were studied using a Healthdyne-Airshields TC-075-1 transcutaneous  $O_2$  system with a protocol approved by the local Human Studies Committee for use without written informed consent. Patients received morphine (5-10 mg im) and atropine (0.2-0.4 mg im) or diazepam (5-10 mg p.o.) for premedication. No additional sedation or analgesia, and no pressor therapy was given after lumbar puncture (LP) in patients studied. TCPO<sub>2</sub> probes were taped to the anterior chest or upper arm and allowed to equilibrate for 15 min prior to LP and injection of tetracaine, lidocaine, or dibucaine adequate for maximum sensory level (MSL) between T<sub>11</sub> and T<sub>2</sub>. After LP, patients remained supine or prone for 25 min and then supplemental  $O_2$  was given for 20 min by nasal prongs connected to an anesthesia breathing circuit with 10-15 cm H<sub>2</sub>O positive  $O_2$  pressure (3-6 L/min). Statistical analysis consisted of t-test, analysis of variance, and chi square analysis, with  $p < 0.05$  the criterion of significance.

**RESULTS:** Mean TCPO<sub>2</sub> for young vs. elderly patients at time of LP<sup>2</sup> ("baseline", figure) did not differ significantly. Similarly, there were no significant changes in TCPO<sub>2</sub> for either group at MSL 25 min later ("spinal").<sup>2</sup> Subsequent  $O_2$  therapy ("oxygen") produced large, significant increases in TCPO<sub>2</sub> in both groups: 97% and 73% for young and elderly, respectively. After return to air ("return"), mean TCPO<sub>2</sub> was indistinguishable from the "baseline" or "spinal" values of either groups. Decrease in blood pressure occurred in elderly patients following LP, but no further changes in vital signs occurred with  $O_2$  therapy (table 1). Demographic comparison revealed significant differences only in age and hemoglobin (table 2).

**DISCUSSION:** During spinal anesthesia, supplementary  $O_2$  therapy by nasal prongs improved peripheral tissue oxygenation as reflected by TCPO<sub>2</sub>. Perhaps because of reductions in blood pressure and, presumably, cardiac output seen during spinal anesthesia, elderly patients had a reduced response to  $O_2$ . The difference in hemoglobin between the two groups, although statistically signifi-

cant, was not sufficient to explain the reduced response. We conclude that although circulatory depression in the elderly may limit the improvement in peripheral oxygenation during  $O_2$  therapy, the response in all patients is large enough to justify routine application of supplementary  $O_2$  during spinal anesthesia.

**REFERENCES:** 1) Kory RC, Bergmann JC, Sweet RD, et al.: Comparative evaluation of oxygen therapy techniques. JAMA 179:767-772, 1962. 2) Littooy F, Fuchs R, Hunt TK, et al.: Tissue oxygen as a real-time measure of oxygen transport. J Surg Res 20:321-325, 1976. 3) Haldén E: Monitoring of optimal oxygen transport by the transcutaneous oxygen tension method in the pig. Acta Anaesth Scandinav 26:209-212, 1982.

Table 1.  
(Mean  $\pm$  S.E.)

|         | baseline        | spinal           | oxygen                       |                 |
|---------|-----------------|------------------|------------------------------|-----------------|
| YOUNG   | BP <sub>S</sub> | 121.9 $\pm$ 3.6* | 118.5 $\pm$ 2.7              | 116.6 $\pm$ 2.3 |
|         | BP <sub>D</sub> | 72.7 $\pm$ 2.6   | 68.0 $\pm$ 1.9               | 66.3 $\pm$ 2.1  |
|         | HR <sup>D</sup> | 80.0 $\pm$ 4.2   | 70.0 $\pm$ 3.6               | 66.2 $\pm$ 3.2  |
| ELDERLY | BP <sub>S</sub> | 135.9 $\pm$ 3.1* | 122.0 $\pm$ 3.1 <sup>†</sup> | 124.6 $\pm$ 3.6 |
|         | BP <sub>D</sub> | 75.2 $\pm$ 1.5   | 68.5 $\pm$ 1.8 <sup>†</sup>  | 70.4 $\pm$ 2.2  |
|         | HR <sup>D</sup> | 71.5 $\pm$ 1.8   | 66.6 $\pm$ 2.4               | 63.6 $\pm$ 1.8  |

\* young vs. elderly,  $p < 0.01$ <sup>†</sup> different from preceding value,  $p < 0.01$ Table 2.  
(Mean  $\pm$  S.E.)

|             | young          | p    | elderly        |
|-------------|----------------|------|----------------|
| n=          | 20             |      | 23             |
| Age (yrs)   | 29.8 $\pm$ 1.4 | <.01 | 72.1 $\pm$ 1.6 |
| Hgb (gm%)   | 14.3 $\pm$ 0.4 | <.05 | 13.1 $\pm$ 0.4 |
| Wt. (kg)    | 78.6 $\pm$ 3.3 | NS   | 73.2 $\pm$ 2.3 |
| MSL (T= )   | 6.7 $\pm$ 0.7  | NS   | 6.6 $\pm$ 0.6  |
| Male/Female | 16/4           | NS   | 18/5           |

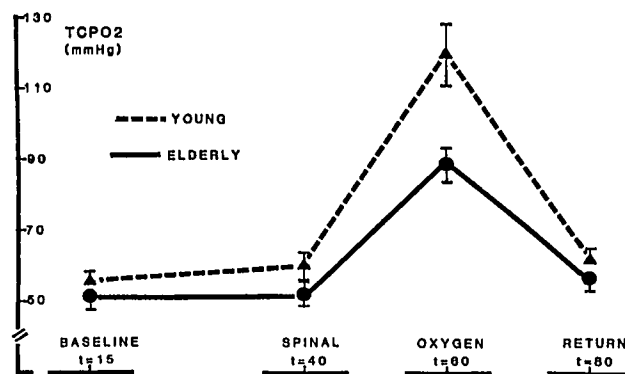

Figure.
